# Supplementary material
Source: HighWire-hosted journal article supplement (doi:10.1101/rna.079636.123)
Supplement: Supplemental_Table_S1.xlsx [file Supplemental_Table_S1.xlsx]

## Sheet: positions
Organism	NCBI_Reference_Sequence	NCBI_Assembly	NCBI_16S_start	NCBI_16S_end	NCBI_23S_start	NCBI_23S_end	16S_start_this_study	16S_end_this_study	23S_start_this_study	23S_end_this_study	new_16S_start_sequence[first21nt]	new_16S_end_sequence[last21nt]	new_23S_start_sequence[first21nt]	new_23S_end_sequence[last21nt]
Haloferax volcanii	NC_013967.1	GCF_000025685.1	1598192	1599672	1600068	1602925	1598192	1599664	1600057	1602957	ATTCCGGTTGATCCTGCCGGA	TCTGCGGCTGGATCACCTCCT	GGCTACTGTGCCAGCTGGTGG	AGCACTAACAGTCCAAGCCAC
Pyrococcus furiosus	NZ_CP023154.1	GCF_008245085.1	120675	122193	122451	125351	120687	122183	circular	circular	ATTCCGGTTGATCCTGCCGGA	CCTACGGCTCGATCACCTCCT	circular	circular
Sulfolobus acidocaldarius	NZ_CP020364.1	GCF_002215565.1	1108630	1107137	1106935	1103897	1108630	1107139	1106919	1103905	ATTCCGGTTGATCCTGCCGGA	AACCTGCGGCTGGATCACCTC	GCCTCCCGGTGGATGGCTCGG	CACTCCCAATCAGGCTCCCCC
