# Supplementary material
Source: HighWire-hosted journal article supplement (doi:10.1101/rna.079636.123)
Supplement: Supplemental_Table_S2.xlsx [file Supplemental_Table_S2.xlsx]

## Sheet: stats
Barcode	Sample	Fastq_pass	Fastq_pass_fl	percentage_fl	Median_length	Median_quality	Primary_mapped	Unmapped	percentage_mapped	Median_fl_aligned	Median_fl_identity
1	hvo_pcrcDNA_wt_1	1334462	1231049	0.922506	278	10.4	640300	590749	0.520126	320	95.6
2	hvo_pcrcDNA_wt_2	1492312	1371671	0.919158	358	10.6	833571	538100	0.607705	423	95.6
3	hvo_pcrcDNA_wt_3	1493792	1358208	0.909235	298	10.4	737877	620331	0.543272	422	95.6
7	sac_pcrcDNA_wt_1	754596	668761	0.88625	552	10.9	474506	194255	0.70953	635	94.3
8	sac_pcrcDNA_wt_2	689976	624573	0.90521	508	10.7	427714	196859	0.68481	658	94.4
9	sac_pcrcDNA_wt_3	1542466	1411464	0.91507	238	10.2	668354	743110	0.473518	683	94.2
10	pfu_pcrcDNA_wt_1	808483	767455	0.949253	507	11.1	703477	63978	0.916636	330	94.2
11	pfu_pcrcDNA_wt_2	1317699	1242110	0.942636	459	10.9	1015091	227019	0.817231	323	94.2
12	pfu_pcrcDNA_wt_3	909376	859289	0.944922	508	10.9	748532	110757	0.871106	353	94.2

## Sheet: explanation
Column	Explanation
Barcode	Barcode used in PCB109 kit
Sample	Organism and biological replicate
Fastq_pass	Number of reads passing the q-score filter (7)
Fastq_pass_fl	Number of reads passing the q-score filter (7) and characterised as full-length by pychopper
percentage_fl	Percentage of reads passing the q-score filter (7) and characterised as full-length by pychopper; compared to total number of reads
Median_length	Median length of sequenced reads (sequence_length_template)
Median_quality	Median quality of sequenced reads (mean_qscore_template)
Primary_mapped	Number of primary mapped reads (samtools flag, fl passed reads)
Unmapped	Number of unmapped reads (samtools flag, fl passed reads)
percentage_mapped	1-(Primary_unmapped/Fastq_pass_fl)
Median_fl_aligned	Median length of aligned reads
Median_fl_identity	Median identity of aligned reads (compare Methods)
